# Supplementary material for: Dose‐response effects of light at night on the reproductive physiology of great tits (Parus major): Integrating morphological analyses with candidate gene expression
Source: PubMed Central journal article supplement (PMC6220976; doi:10.1002/jez.2214), 2018-07-29
Supplement: JEZ-329-473-s001.pdf [file JEZ-329-473-s001.pdf]

Supplementary online material for:

**Dose-response effects of light at night on the reproductive physiology of great tits (*Parus major*): integrating morphological analyses with candidate gene expression**

Davide M. Dominoni, Maaïke de Jong, Michelle Bellingham, Peter O'Shaughnessy, Kees van Oers, Jane Robinson, Bethany Smith, Marcel E. Visser, Barbara Helm

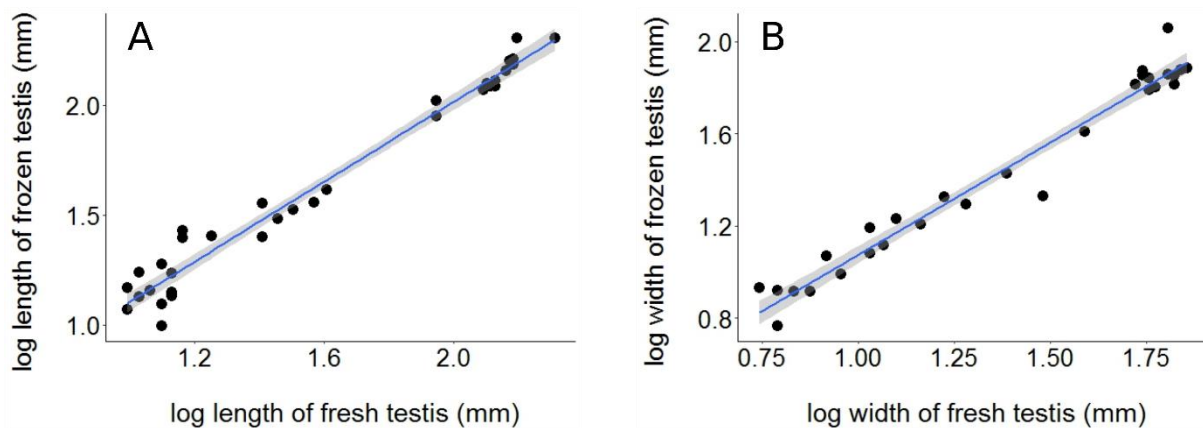

**Figure S1.** Correlation between fresh and frozen measurements of testis length (A) and testis width (B) obtained from great tits from a separate experiment (data courtesy of Irene Verhagen)

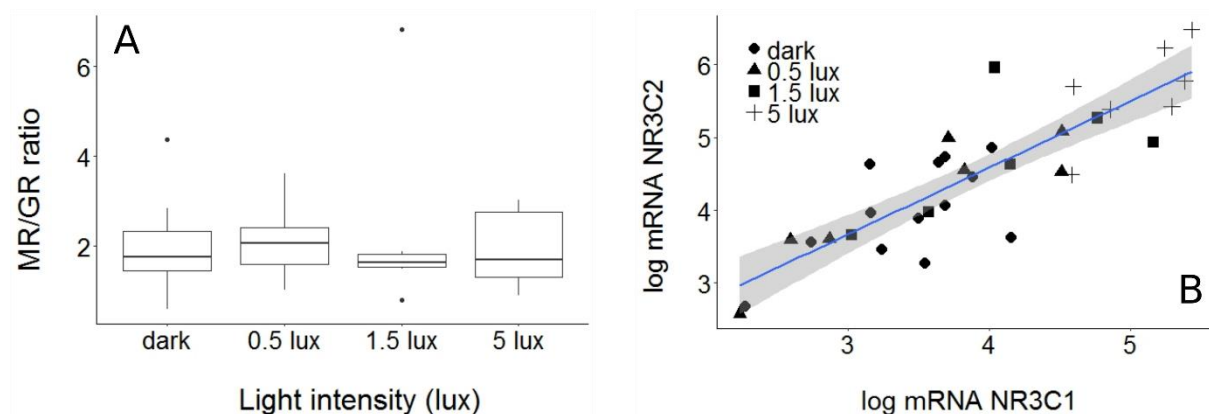

**Figure S2.** Panel A: Variation in the ratio between MR (*NR3C2*) and GR (*NR3C1*) mRNA transcript levels in the testes between the four treatments was not significant ( $p = 0.753$ ). Panel B: GR and MR transcript levels were correlated within individuals ( $p < 0.001$ ).

**Table S1:** List of primers used in the experiment.

| <b>Gene name</b>                                                             | <b>Gene acronym</b> | <b>Forward primer</b>       | <b>Reverse primer</b>           |
|------------------------------------------------------------------------------|---------------------|-----------------------------|---------------------------------|
| Hydroxy-delta-5-steroid dehydrogenase, 3 beta- and steroid delta-isomerase 1 | HSD3B1              | aagaggaggcgctggctgaga       | gatgacgaggagacgccctg            |
| Luteinizing hormone receptor                                                 | LHR                 | gagtgtgaaagcaccatgaggaaacc  | agccggccatttcgctgtc             |
| Follicle stimulating hormone receptor                                        | FSHR                | gcaaacttcacctatcctagccattgc | tctgtagtcttctgccaggcttctcc      |
| Claudin-11                                                                   | CLDN11              | tcggctacaccatcaccacc        | gcgatcatcagcgtcgacat            |
| Wilms tumor protein                                                          | WT1                 | cacagcttgaatgcatgacatggaatc | cacgtcttgatgcctctaaaaactccg     |
| SRY (Sex Determining Region Y)-Box 9                                         | SOX9                | gctccagcaagaacaaaccgcac     | tctcgtctcgttcagcagcct           |
| SPO11, initiator of meiotic double stranded breaks                           | SPO11               | gtgaattgtacctgcagtcaacagc   | ctttattgaagaagtcacatccaggagtctc |
| STRA 8, stimulated by retinoic acid gene 8                                   | STRA8               | tatccccagatctagtggaattgaacg | tccctgctcttccagaaagctcttg       |
| Nuclear receptor subfamily 3, group C, member 1                              | NR3C1 (GR)          | attggctccgctgggaacg         | aggcctcgtcagacacacca            |
| Nuclear receptor subfamily 3, group C, member 2                              | NR3C2 (MR)          | tgtgtctgcatcgtttgccttgag    | cggacgaactgcaggctgatct          |

**Table S2.** Summary of model outputs for the morphological and histological data collected on testes. All models were linear mixed models with Gaussian error structure with treatment, age and mass as explanatory variables, and block (position of a cage within the wall of an experimental room) as random effect nested into room. Model selection was conducted by backward, step-wise removal of non-significant variables. Post-hoc tests were done by comparing the confidence intervals (CI) of the estimates for each level of the continuous variable treatment or the factor time. Two levels were considered to be significantly different if the mean estimate for one level was not included in the CI of the other level, and such differences are indicated by different letters in the column “sig”. Reference level for treatment is the dark group, for time it is daytime.

| Main model             |          |      |    |       |        | Post-hoc test          |          |      |          |          |     |
|------------------------|----------|------|----|-------|--------|------------------------|----------|------|----------|----------|-----|
| <b>Tubule diameter</b> |          |      |    |       |        | <b>Tubule diameter</b> |          |      |          |          |     |
| Parameter              | Estimate | SEM  | df | t     | p      | Treatment              | Estimate | SEM  | lower CI | upper CI | sig |
| Intercept              | 49.00    | 4.76 | 11 | 10.29 | <0.001 | dark                   | 49.00    | 4.78 | 38.56    | 59.45    | a   |
| Treatment              | 26.96    | 1.77 | 24 | 15.20 | <0.001 | 0.5                    | 62.48    | 4.35 | 52.98    | 71.99    | b   |
|                        |          |      |    |       |        | 1.5                    | 89.45    | 3.97 | 80.76    | 98.13    | c   |
|                        |          |      |    |       |        | 5                      | 183.82   | 7.39 | 167.67   | 199.97   | d   |
| <b>Testis volume</b>   |          |      |    |       |        | <b>Testis volume</b>   |          |      |          |          |     |
| Parameter              | Estimate | SEM  | df | t     | p      | Treatment              | Estimate | SEM  | lower CI | upper CI | sig |
| Intercept              | 2.55     | 1.29 | 18 | 1.98  | 0.063  | dark                   | 2.55     | 1.29 | -0.17    | 5.27     | a   |
| Treatment              | -0.16    | 1.99 | 25 | -0.08 | 0.938  | 0.5                    | 2.84     | 1.04 | 0.64     | 5.03     | a   |
| Treatment <sup>2</sup> | 1.45     | 0.38 | 25 | 3.80  | <0.001 | 1.5                    | 5.58     | 1.70 | 2.01     | 9.16     | b   |
|                        |          |      |    |       |        | 5                      | 38.05    | 1.81 | 34.24    | 41.87    | c   |

**Table S3.** Summary of model outputs for individual gene expression data. All models were linear mixed models with Gaussian error structure with treatment, time, age, mass and the interaction treatment\*time as explanatory variables, and block (position of a cage within the wall of an experimental room) as random variable. Post-hoc tests were done as indicated in Table S2.

| Main model   |          |      |    |       |        | Post-hoc test |          |          |          |          |          |     |
|--------------|----------|------|----|-------|--------|---------------|----------|----------|----------|----------|----------|-----|
| <b>STRA8</b> |          |      |    |       |        | <b>STRA8</b>  |          |          |          |          |          |     |
| Parameter    | Estimate | SEM  | df | t     | p      | Treatment     | Time     | Estimate | SEM      | lower CI | upper CI | sig |
| Intercept    | 1.66     | 0.45 | 18 | 3.66  | 0.002  | dark          | day      | 1.66     | 0.46     | 0.69     | 2.62     | a   |
| Time         | -1.89    | 0.47 | 28 | -3.99 | <0.001 | 0.5           | day      | 2.22     | 0.45     | 1.28     | 3.16     | a   |
| Treatment    | 1.11     | 0.11 | 25 | 9.88  | <0.001 | 1.5           | day      | 3.33     | 0.44     | 2.40     | 4.26     | b   |
|              |          |      |    |       |        | 5             | day      | 7.23     | 0.62     | 5.93     | 8.54     | c   |
|              |          |      |    |       |        | dark          | night    | 0.23     | 0.41     | -1.10    | 0.64     | d   |
|              |          |      |    |       |        | 0.5           | night    | 0.33     | 0.39     | -0.50    | 1.15     | d   |
|              |          |      |    |       |        | 1.5           | night    | 1.44     | 0.37     | 0.67     | 2.22     | a   |
|              |          |      |    |       |        | 5             | night    | 5.34     | 0.53     | 4.24     | 6.45     | e   |
| <b>SPO11</b> |          |      |    |       |        | <b>SPO11</b>  |          |          |          |          |          |     |
| Parameter    | Estimate | SEM  | df | t     | p      | Treatment     | Time     | Estimate | SEM      | lower CI | upper CI | sig |
| Intercept    | 0.61     | 0.25 | 24 | 2.40  | 0.024  | dark          | day      | 0.61     | 0.26     | 0.07     | 1.15     | a   |
| Time         | -0.69    | 0.29 | 30 | -2.35 | 0.026  | 0.5           | day      | 1.16     | 0.25     | 0.64     | 1.68     | b   |
| Treatment    | 1.11     | 0.07 | 25 | 15.23 | <0.001 | 1.5           | day      | 2.27     | 0.25     | 1.76     | 2.78     | c   |
|              |          |      |    |       |        | 5             | day      | 6.14     | 0.37     | 5.37     | 6.92     | d   |
|              |          |      |    |       |        | dark          | night    | 0.08     | 0.22     | -0.54    | 0.38     | e   |
|              |          |      |    |       |        | 0.5           | night    | 0.47     | 0.21     | 0.05     | 0.90     | a   |
|              |          |      |    |       |        | 1.5           | night    | 1.58     | 0.19     | 1.19     | 1.97     | c   |
|              |          |      |    |       |        | 5             | night    | 5.46     | 0.31     | 4.82     | 6.09     | d   |
| <b>FSHR</b>  |          |      |    |       |        | <b>FSHR</b>   |          |          |          |          |          |     |
| Parameter    | Estimate | SEM  | df | t     | p      | Treatment     | Estimate | SEM      | lower CI | upper CI | sig      |     |
| Intercept    | 3.93     | 0.26 | 23 | 14.97 | <0.001 | dark          | 4.43     | 0.19     | 4.01     | 4.85     | a        |     |
| Treatment    | 0.24     | 0.06 | 25 | 3.93  | 0.001  | 0.5           | 4.55     | 0.17     | 4.16     | 4.94     | a        |     |
| Age          | 0.22     | 0.09 | 26 | 2.50  | 0.019  | 1.5           | 4.79     | 0.16     | 4.42     | 5.15     | b        |     |
|              |          |      |    |       |        | 5             | 5.62     | 0.27     | 5.01     | 6.23     | c        |     |
| <b>WT1</b>   |          |      |    |       |        | <b>WT1</b>    |          |          |          |          |          |     |
| Parameter    | Estimate | SEM  | df | t     | p      | Treatment     | Estimate | SEM      | lower CI | upper CI | sig      |     |
| Intercept    | 5.33     | 0.18 | 9  | 29.10 | <0.001 | dark          | 5.33     | 0.18     | 4.91     | 5.74     | a        |     |
| Treatment    | 0.41     | 0.05 | 25 | 7.67  | <0.001 | 0.5           | 5.53     | 0.17     | 5.13     | 5.93     | ab       |     |
|              |          |      |    |       |        | 1.5           | 5.94     | 0.17     | 5.56     | 6.32     | b        |     |
|              |          |      |    |       |        | 5             | 7.36     | 0.25     | 6.79     | 7.94     | c        |     |

**SOX9**

| Parameter | Estimate | SEM  | df | t     | p      |
|-----------|----------|------|----|-------|--------|
| Intercept | 4.04     | 0.40 | 25 | 10.12 | <0.001 |
| Treatment | 0.69     | 0.10 | 25 | 6.96  | <0.001 |
| Age       | 0.45     | 0.14 | 27 | 3.21  | 0.003  |

**SOX9**

| Treatment | Estimate | SEM  | lower CI | upper CI | sig |
|-----------|----------|------|----------|----------|-----|
| dark      | 5.08     | 0.27 | 4.49     | 5.67     | a   |
| 0.5       | 5.43     | 0.25 | 4.89     | 5.96     | ab  |
| 1.5       | 6.11     | 0.23 | 5.61     | 6.61     | b   |
| 5         | 8.52     | 0.42 | 7.60     | 9.44     | c   |

**CLDN11**

| Parameter | Estimate | SEM  | df | t     | p      |
|-----------|----------|------|----|-------|--------|
| Intercept | 7.13     | 0.28 | 31 | 25.81 | <0.001 |
| Treatment | 0.48     | 0.12 | 31 | 4.21  | <0.001 |

**CLDN11**

| Treatment | Estimate | SEM  | lower CI | upper CI | sig |
|-----------|----------|------|----------|----------|-----|
| dark      | 7.13     | 0.28 | 6.53     | 7.73     | a   |
| 0.5       | 7.37     | 0.25 | 6.84     | 7.91     | a   |
| 1.5       | 7.86     | 0.22 | 7.38     | 8.34     | b   |
| 5         | 9.55     | 0.47 | 8.54     | 10.56    | c   |

**LHR**

| Parameter | Estimate | SEM  | df | t     | p      |
|-----------|----------|------|----|-------|--------|
| Intercept | 4.31     | 0.20 | 30 | 21.24 | <0.001 |
| Treatment | 0.22     | 0.05 | 30 | 4.15  | <0.001 |
| Age       | 0.29     | 0.07 | 30 | 3.96  | <0.001 |

**LHR**

| Treatment | Estimate | SEM  | lower CI | upper CI | sig |
|-----------|----------|------|----------|----------|-----|
| dark      | 5.00     | 0.13 | 4.72     | 5.28     | a   |
| 0.5       | 5.11     | 0.12 | 4.86     | 5.36     | ab  |
| 1.5       | 5.33     | 0.10 | 5.10     | 5.55     | b   |
| 5         | 6.10     | 0.22 | 5.63     | 6.57     | c   |

**HSD3B1**

| Parameter | Estimate | SEM  | df | t     | p      |
|-----------|----------|------|----|-------|--------|
| Intercept | 4.63     | 0.21 | 30 | 21.93 | <0.001 |
| Treatment | 0.29     | 0.06 | 30 | 5.34  | <0.001 |
| Age       | 0.26     | 0.08 | 30 | 3.44  | 0.002  |

**HSD3B1**

| Treatment | Estimate | SEM  | lower CI | upper CI | sig |
|-----------|----------|------|----------|----------|-----|
| dark      | 5.25     | 0.13 | 4.96     | 5.53     | a   |
| 0.5       | 5.49     | 0.12 | 5.13     | 5.65     | a   |
| 1.5       | 5.69     | 0.11 | 5.45     | 5.92     | b   |
| 5         | 6.72     | 0.23 | 6.23     | 7.21     | c   |

**GR**

| Parameter | Estimate | SEM  | df | t     | p      |
|-----------|----------|------|----|-------|--------|
| Intercept | 3.05     | 0.21 | 25 | 14.62 | <0.001 |
| Treatment | 0.34     | 0.05 | 25 | 6.58  | <0.001 |
| Age       | 0.18     | 0.07 | 27 | 2.52  | 0.018  |

**GR**

| Treatment | Estimate | SEM  | lower CI | upper CI | sig |
|-----------|----------|------|----------|----------|-----|
| dark      | 3.47     | 0.14 | 3.16     | 3.78     | a   |
| 0.5       | 3.64     | 0.13 | 3.35     | 3.93     | a   |
| 1.5       | 3.98     | 0.12 | 3.71     | 4.24     | b   |
| 5         | 5.15     | 0.22 | 4.67     | 5.63     | c   |

**MR**

| Parameter | Estimate | SEM  | df | t     | p      |
|-----------|----------|------|----|-------|--------|
| Intercept | 4.42     | 0.22 | 20 | 20.17 | <0.001 |
| Time      | -0.66    | 0.23 | 29 | -2.80 | 0.009  |
| Treatment | 0.35     | 0.06 | 25 | 6.22  | <0.001 |

**MR**

| Treatment | Time  | Estimate | SEM  | lower CI | upper CI | sig |
|-----------|-------|----------|------|----------|----------|-----|
| dark      | day   | 4.42     | 0.22 | 3.96     | 4.89     | a   |
| 0.5       | day   | 4.60     | 0.22 | 4.14     | 5.05     | ab  |
| 1.5       | day   | 4.95     | 0.21 | 4.50     | 5.39     | b   |
| 5         | day   | 6.17     | 0.31 | 5.53     | 6.81     | c   |
| dark      | night | 3.77     | 0.20 | 3.35     | 4.18     | d   |
| 0.5       | night | 3.94     | 0.19 | 3.55     | 4.33     | d   |
| 1.5       | night | 4.29     | 0.18 | 3.92     | 4.66     | ad  |
| 5         | night | 5.51     | 0.26 | 4.97     | 6.05     | e   |

**Table S4.** Summary of models testing for the relationship between testis volume and gene transcript levels (both log-transformed). All models were linear mixed models with Gaussian error structure with testis volume, treatment, age, mass and the interaction treatment\*testis volume as explanatory variables, and block (position of a cage within the wall of an experimental room) as random effect nested into room.

| <b>STRA8</b>       |                 |            |           |          |          |
|--------------------|-----------------|------------|-----------|----------|----------|
|                    | <b>Estimate</b> | <b>SEM</b> | <b>df</b> | <b>t</b> | <b>p</b> |
| (Intercept)        | -0.84           | 0.37       | 27        | -2.28    | 0.031    |
| log(Testis.volume) | 1.87            | 0.18       | 24        | 10.44    | < 0.001  |

| <b>SPO11</b>       |                 |            |           |          |          |
|--------------------|-----------------|------------|-----------|----------|----------|
|                    | <b>Estimate</b> | <b>SEM</b> | <b>df</b> | <b>t</b> | <b>p</b> |
| (Intercept)        | -0.57           | 0.33       | 28        | -1.71    | 0.098    |
| log(testis volume) | 0.98            | 0.34       | 28        | 2.89     | 0.007    |

| <b>FSHR</b>        |                 |            |           |          |          |
|--------------------|-----------------|------------|-----------|----------|----------|
|                    | <b>Estimate</b> | <b>SEM</b> | <b>df</b> | <b>t</b> | <b>p</b> |
| (Intercept)        | -1.20           | 0.25       | 29        | -4.71    | < 0.001  |
| log(testis volume) | 1.83            | 0.12       | 29        | 14.73    | < 0.001  |

| <b>WT1</b>         |                 |            |           |          |          |
|--------------------|-----------------|------------|-----------|----------|----------|
|                    | <b>Estimate</b> | <b>SEM</b> | <b>df</b> | <b>t</b> | <b>p</b> |
| (Intercept)        | 4.76            | 0.19       | 17        | 24.56    | < 0.001  |
| log(testis volume) | 0.72            | 0.08       | 24        | 9.47     | < 0.001  |

| <b>SOX9</b>        |                 |            |           |          |          |
|--------------------|-----------------|------------|-----------|----------|----------|
|                    | <b>Estimate</b> | <b>SEM</b> | <b>df</b> | <b>t</b> | <b>p</b> |
| (Intercept)        | 3.96            | 0.31       | 29        | 12.74    | < 0.001  |
| log(testis volume) | 1.27            | 0.15       | 29        | 8.36     | < 0.001  |

| <b>CLDN11</b>      |                 |            |           |          |          |
|--------------------|-----------------|------------|-----------|----------|----------|
|                    | <b>Estimate</b> | <b>SEM</b> | <b>df</b> | <b>t</b> | <b>p</b> |
| (Intercept)        | 6.40            | 0.36       | 29        | 17.61    | < 0.001  |
| log(testis volume) | 0.90            | 0.18       | 29        | 5.10     | < 0.001  |

| <b>LHR</b>         |                 |            |           |          |          |
|--------------------|-----------------|------------|-----------|----------|----------|
|                    | <b>Estimate</b> | <b>SEM</b> | <b>df</b> | <b>t</b> | <b>p</b> |
| (Intercept)        | 4.68            | 0.21       | 29        | 22.57    | < 0.001  |
| log(testis volume) | 0.37            | 0.10       | 29        | 3.68     | 0.001    |

| <b>HSD3B1</b>      |                 |            |           |          |          |
|--------------------|-----------------|------------|-----------|----------|----------|
|                    | <b>Estimate</b> | <b>SEM</b> | <b>df</b> | <b>t</b> | <b>p</b> |
| (Intercept)        | 4.86            | 0.19       | 25        | 25.11    | < 0.001  |
| log(testis volume) | 0.50            | 0.09       | 24        | 5.27     | < 0.001  |

| <b>GR</b>          |                 |            |           |          |          |
|--------------------|-----------------|------------|-----------|----------|----------|
|                    | <b>Estimate</b> | <b>SEM</b> | <b>df</b> | <b>t</b> | <b>p</b> |
| (Intercept)        | 3.00            | 0.16       | 25        | 18.59    | < 0.001  |
| log(testis volume) | 0.59            | 0.08       | 24        | 7.69     | < 0.001  |

| <b>MR</b>          |                 |            |           |          |          |
|--------------------|-----------------|------------|-----------|----------|----------|
|                    | <b>Estimate</b> | <b>SEM</b> | <b>df</b> | <b>t</b> | <b>p</b> |
| (Intercept)        | 3.63            | 0.20       | 25        | 17.94    | < 0.001  |
| log(testis volume) | 0.57            | 0.10       | 24        | 5.88     | < 0.001  |
